# Supplementary material for: Growth Factor-Activated Stem Cell Circuits and Stromal Signals Cooperatively Accelerate Non-Integrated iPSC Reprogramming of Human Myeloid Progenitors
Source: PLoS One. 2012 Aug 8;7(8):e42838. doi: 10.1371/journal.pone.0042838 (PMC3414503; doi:10.1371/journal.pone.0042838)
Supplement: Table S3 — Gene Specific Enrichment Analysis (GSEA) results of microarray data of purified and 4F-nucleofected Day 0 CB cells co-cultured with (+) or without (−) BMSC (xls file). Significantly expressed gene sets were determined from normalized Illumina array data using the GSEA computational method, as described [45]. Shown are rank order lists of GSEA results from day 3 (+/− BMSC-primed) CB microarray samples, as described in Methods. These curated sets of genes were analyzed using GSEAP v2.07 (http://www.broad.mit.edu/gsea) software and the MSigDB v. 3.0 CP (canonical pathways) gene sets, with an FDR <0.05, and nominal p value<0.05 were chosen as thresholds for significance. The GSEA method determined that several distinct pathways were significantly over-represented in +BMSC-primed CB cells (+BMSC CB > –BMSC CB). These pathways included highly significant enrichment foractivation of CB cells by 1) GF and contact-dependent pathways that signal through JAK-STAT3 and are downstream of Toll Receptor-NFκB activation, 2) NFkB signaling pathways that suppress apoptosis, and 3) pathways that activate WNT signaling, destabilize p53, and regulate cell cycle transition (XLS) [file pone.0042838.s014.xls]

## Sheet: +BMSC  CB> -BMSC CB
NAME	SIZE	NOM p-val	FDR q-val	FWER p-val
REACTOME_SIGNALING_IN_IMMUNE_SYSTEM	328	0	0	0		Enrichment in soluble GF as well as cell contact-dependent pathways that signal through JAK-STAT3 and are downstream of Toll Receptor-NFkB activation
KEGG_CELL_ADHESION_MOLECULES_CAMS	134	0	0	0
KEGG_LYSOSOME	121	0	0	0
KEGG_OXIDATIVE_PHOSPHORYLATION	120	0	0	0
REACTOME_INNATE_IMMUNITY_SIGNALING	103	0	0	0
KEGG_TOLL_LIKE_RECEPTOR_SIGNALING_PATHWAY	100	0	0	0
KEGG_ANTIGEN_PROCESSING_AND_PRESENTATION	89	0	0	0
REACTOME_TOLL_RECEPTOR_CASCADES	83	0	0	0
REACTOME_IMMUNOREGULATORY_INTERACTIONS_BETWEEN_A_LYMPHOID_AND_A_NON_LYMPHOID_CELL	72	0	0	0
KEGG_LEISHMANIA_INFECTION	70	0	0	0
REACTOME_ELECTRON_TRANSPORT_CHAIN	63	0	0	0
REACTOME_ORC1_REMOVAL_FROM_CHROMATIN	63	0	0	0
REACTOME_CYCLIN_E_ASSOCIATED_EVENTS_DURING_G1_S_TRANSITION_	58	0	0	0
KEGG_AUTOIMMUNE_THYROID_DISEASE	53	0	0	0
REACTOME_SCF_SKP2_MEDIATED_DEGRADATION_OF_P27_P21	52	0	0	0
REACTOME_CDT1_ASSOCIATION_WITH_THE_CDC6_ORC_ORIGIN_COMPLEX	52	0	0	0
KEGG_PROTEASOME	48	0	0	0
KEGG_INTESTINAL_IMMUNE_NETWORK_FOR_IGA_PRODUCTION	48	0	0	0
REACTOME_SCF_BETA_TRCP_MEDIATED_DEGRADATION_OF_EMI1	48	0	0	0
REACTOME_VIF_MEDIATED_DEGRADATION_OF_APOBEC3G	47	0	0	0
REACTOME_REGULATION_OF_ORNITHINE_DECARBOXYLASE	47	0	0	0
REACTOME_STABILIZATION_OF_P53	46	0	0	0
REACTOME_NCAM1_INTERACTIONS	44	0	0	0
KEGG_TYPE_I_DIABETES_MELLITUS	44	0	0	0
REACTOME_P53_INDEPENDENT_DNA_DAMAGE_RESPONSE	43	0	0	0
KEGG_GRAFT_VERSUS_HOST_DISEASE	42	0	0	0
KEGG_ALLOGRAFT_REJECTION	38	0	0	0		Enrichment in pathways that activate WNT signaling, destabilize p53, or regulate cell cycle transition
BIOCARTA_TOLL_PATHWAY	35	0	0	0
REACTOME_TOLL_LIKE_RECEPTOR_4_CASCADE	28	0	0	0
REACTOME_PHOSPHORYLATION_OF_CD3_AND_TCR_ZETA_CHAINS	22	0	0	0
REACTOME_TRANSLOCATION_OF_ZAP70_TO_IMMUNOLOGICAL_SYNAPSE	20	0	0	0
REACTOME_MYD88_CASCADE	19	0	0.000177402	0.005
REACTOME_PD1_SIGNALING	25	0	0.000182946	0.005
REACTOME_SIGNALING_BY_WNT	58	0	0.000238653	0.007
KEGG_PARKINSONS_DISEASE	118	0	0.000301678	0.009
REACTOME_CDC20_PHOSPHO_APC_MEDIATED_DEGRADATION_OF_CYCLIN_A	62	0	0.000348471	0.011
REACTOME_AUTODEGRADATION_OF_CDH1_BY_CDH1_APC	57	0	0.000358151	0.011
REACTOME_M_G1_TRANSITION	61	0	0.00102573	0.034
BIOCARTA_PROTEASOME_PATHWAY	19	0	0.00105272	0.034
REACTOME_REGULATION_OF_APC_ACTIVATORS_BETWEEN_G1_S_AND_EARLY_ANAPHASE	70	0	0.00106182	0.036
REACTOME_TOLL_LIKE_RECEPTOR_9_CASCADE	23	0	0.00118188	0.041
REACTOME_ACTIVATED_TLR4_SIGNALLING	24	0.00206186	0.00179715	0.064
REACTOME_SIGNALING_BY_PDGF	64	0	0.00180972	0.065
KEGG_HUNTINGTONS_DISEASE	177	0	0.00199257	0.075
REACTOME_HOST_INTERACTIONS_OF_HIV_FACTORS	120	0	0.00201235	0.074
KEGG_ASTHMA	30	0	0.0023344	0.09
REACTOME_DIABETES_PATHWAYS	369	0	0.00255998	0.102
REACTOME_REGULATION_OF_INSULIN_SECRETION	198	0	0.00256384	0.101
BIOCARTA_CLASSIC_PATHWAY	14	0.00207469	0.00287309	0.114
REACTOME_GLUCOSE_REGULATION_OF_INSULIN_SECRETION	147	0	0.00295562	0.12
REACTOME_DNA_REPLICATION_PRE_INITIATION	75	0	0.00313035	0.128
REACTOME_SYNTHESIS_OF_DNA	88	0	0.00336656	0.14
REACTOME_GENERATION_OF_SECOND_MESSENGER_MOLECULES	33	0.00204918	0.00339213	0.143		Enrichment in NFkB Signaling Pathways and Pathways that suppress Apoptosis
REACTOME_NCAM_SIGNALING_FOR_NEURITE_OUT_GROWTH	69	0	0.00389079	0.168
REACTOME_HIV_INFECTION	183	0	0.00394006	0.168
REACTOME_S_PHASE	102	0	0.00420191	0.184
REACTOME_COMPLEMENT_CASCADE	20	0.00209644	0.00421046	0.188
REACTOME_G1_S_TRANSITION	100	0	0.00489462	0.22
REACTOME_COSTIMULATION_BY_THE_CD28_FAMILY	65	0	0.00525485	0.235
KEGG_VIRAL_MYOCARDITIS	73	0.00190114	0.00836554	0.349
KEGG_GALACTOSE_METABOLISM	26	0.00207469	0.00846023	0.359
REACTOME_FORMATION_OF_ATP_BY_CHEMIOSMOTIC_COUPLING	13	0	0.00907041	0.386
BIOCARTA_NFKB_PATHWAY	22	0	0.0096786	0.412
BIOCARTA_GSK3_PATHWAY	27	0	0.0100993	0.428
BIOCARTA_SODD_PATHWAY	10	0	0.0107057	0.454
BIOCARTA_TID_PATHWAY	19	0.00614754	0.0108789	0.474
BIOCARTA_COMP_PATHWAY	19	0	0.0109371	0.469
REACTOME_METABOLISM_OF_AMINO_ACIDS	162	0	0.0116125	0.505
REACTOME_CELL_CYCLE_CHECKPOINTS	108	0	0.0116258	0.502
SA_MMP_CYTOKINE_CONNECTION	15	0	0.0119691	0.523
BIOCARTA_CCR5_PATHWAY	17	0	0.0120723	0.523
KEGG_ALZHEIMERS_DISEASE	161	0	0.0123446	0.535
BIOCARTA_RANKL_PATHWAY	14	0.00400802	0.0132303	0.574
REACTOME_COLLAGEN_MEDIATED_ACTIVATION_CASCADE	23	0.00614754	0.013284	0.57
REACTOME_CHEMOKINE_RECEPTORS_BIND_CHEMOKINES	54	0	0.0156249	0.646
KEGG_CYTOKINE_CYTOKINE_RECEPTOR_INTERACTION	265	0	0.0172988	0.686
BIOCARTA_TNFR2_PATHWAY	18	0.00398406	0.0192779	0.722
REACTOME_INITIAL_TRIGGERING_OF_COMPLEMENT	13	0.00190476	0.0226821	0.777
KEGG_SYSTEMIC_LUPUS_ERYTHEMATOSUS	139	0	0.0245595	0.808		Enrichment in pathways that favor mitochondrial aerobic metabolism
REACTOME_INTEGRATION_OF_ENERGY_METABOLISM	214	0	0.030527	0.871
REACTOME_CELL_SURFACE_INTERACTIONS_AT_THE_VASCULAR_WALL	94	0	0.0373277	0.923
REACTOME_REGULATION_OF_INSULIN_LIKE_GROWTH_FACTOR_ACTIVITY_BY_INSULIN_LIKE_GROWTH_FACTOR_BINDING_PROTEINS	17	0.015748	0.0431478	0.962
BIOCARTA_IL17_PATHWAY	15	0.00838574	0.0432616	0.966
REACTOME_CLASSICAL_ANTIBODY_MEDIATED_COMPLEMENT_ACTIVATION	5	0.0094697	0.0434855	0.961
REACTOME_APOPTOSIS	128	0	0.0434922	0.966
KEGG_HEMATOPOIETIC_CELL_LINEAGE	87	0	0.0435809	0.958
REACTOME_MEMBRANE_TRAFFICKING	78	0	0.0450105	0.975
REACTOME_CITRIC_ACID_CYCLE	19	0.0107991	0.0455016	0.975
BIOCARTA_SET_PATHWAY	11	0.00821355	0.0470519	0.976
REACTOME_ERKS_ARE_INACTIVATED	12	0.0170213	0.0474204	0.978
REACTOME_HIV1_TRANSCRIPTION_INITIATION	39	0.00205339	0.0483134	0.979
KEGG_PROTEIN_EXPORT	23	0.0078125	0.048477	0.979
REACTOME_AXON_GUIDANCE	159	0.00203252	0.0486646	0.979
REACTOME_CYTOSOLIC_TRNA_AMINOACYLATION	22	0.0137525	0.0495393	0.979

## Sheet: -BMSC  CB> +BMSC CB
NAME	SIZE	NOM p-val	FDR q-val	FWER p-val
REACTOME_STEROID_METABOLISM	62	0	0	0
REACTOME_CHOLESTEROL_BIOSYNTHESIS	21	0	0	0
BIOCARTA_AHSP_PATHWAY	13	0	0.00276516	0.01
KEGG_STEROID_BIOSYNTHESIS	17	0	0.00414004	0.02
KEGG_STEROID_HORMONE_BIOSYNTHESIS	55	0	0.0157271	0.09
REACTOME_ENDOGENOUS_STEROLS	14	0	0.0211583	0.143
BIOCARTA_UCALPAIN_PATHWAY	18	0.00191571	0.0230548	0.174
REACTOME_PLATELET_DEGRANULATION	84	0	0.0295467	0.25
REACTOME_GRB2_SOS_PROVIDES_LINKAGE_TO_MAPK_SIGNALING_FOR_INTERGRINS_	15	0.00198413	0.0395922	0.358
